# Supplementary material for: Non-destructive food-quality analysis using near-infrared luminescence from Mg3Gd2Ge3O12:Cr3+
Source: Royal Society of Chemistry journal article supplement (doi:10.1039/d3dt01934a), 2023-01-01
Supplement: d3dt01934a1.pdf [file d3dt01934a1.pdf]

## Supporting Information

### Non-destructive food-quality analysis using near-infrared luminescence from $\text{Mg}_3\text{Gd}_2\text{Ge}_3\text{O}_{12}:\text{Cr}^{3+}$

Chaojie Li<sup>a</sup>, Małgorzata Sójka<sup>b</sup>, Jiyou Zhong<sup>a,\*</sup> and Jakoah Brgoch<sup>b,\*</sup>

<sup>a</sup>*School of Physics and Optoelectronic Engineering, Guangdong University of Technology, Guangzhou 510006, China. E-mail: [zhongjiyou@126.com](mailto:zhongjiyou@126.com).*

<sup>b</sup>*Department of Chemistry, University of Houston, Houston, Texas 77204, United States. Email: [jbrgoch@uh.edu](mailto:jbrgoch@uh.edu).*

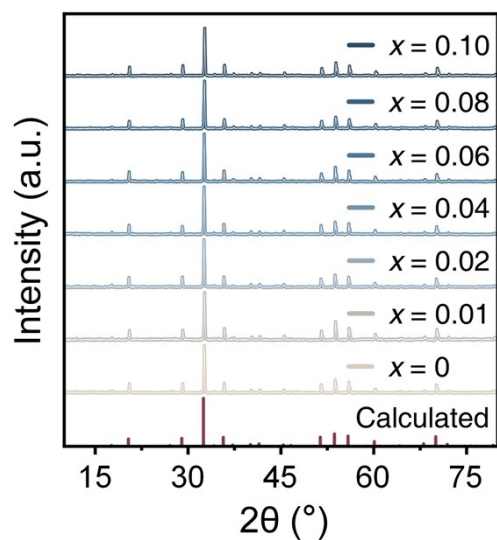

**Fig. S1.** XRD patterns of the  $\text{Mg}_{3-x}\text{Gd}_2\text{Ge}_3\text{O}_{12}:x\text{Cr}^{3+}$  ( $x = 0, 0.01, 0.02, 0.04, 0.06, 0.08,$  and  $0.10$ ) samples compared with the calculated XRD pattern.

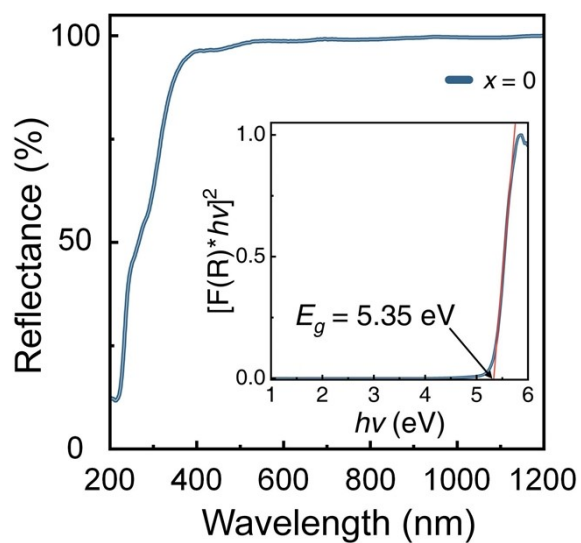

**Fig. S2.** Diffraction reflection (DR) spectra and optical band gap (inset) of  $\text{Mg}_3\text{Gd}_2\text{Ge}_3\text{O}_{12}$  sample.

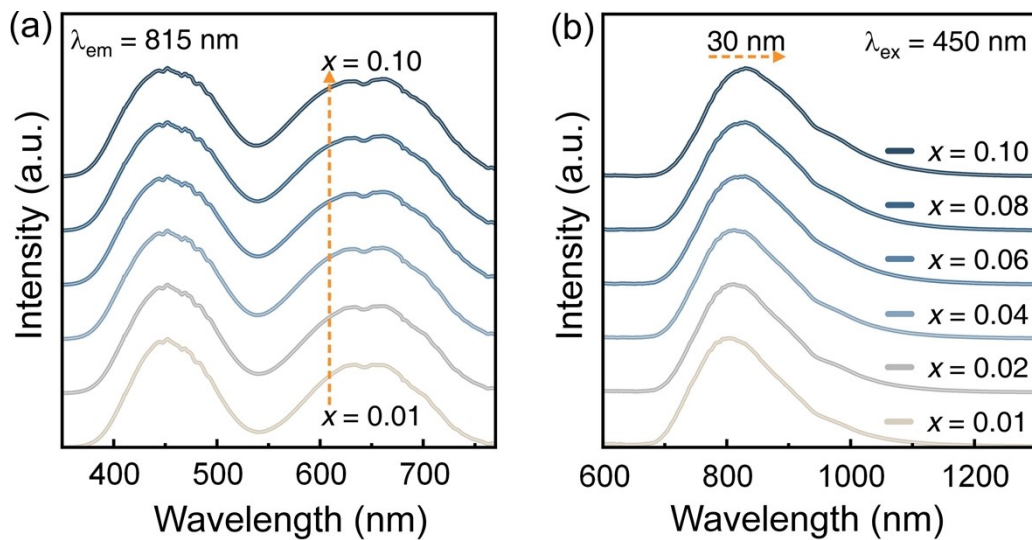

**Fig. S3.** (a) Photoluminescence excitation, and (b) emission spectra of  $\text{Mg}_{3-x}\text{Gd}_2\text{Ge}_3\text{O}_{12}:x\text{Cr}^{3+}$  ( $x = 0, 0.01, 0.02, 0.04, 0.06, 0.08, \text{ and } 0.10$ ) samples monitored at 815 nm and excited by 450 nm.

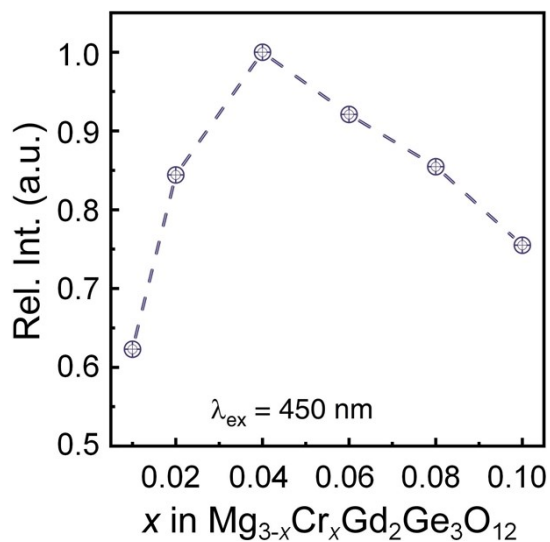

**Fig. S4.** Relative intensity of  $\text{Mg}_{3-x}\text{Gd}_2\text{Ge}_3\text{O}_{12}:x\text{Cr}^{3+}$  ( $x = 0.01\text{--}0.10$ ) phosphors excited by 450 nm.

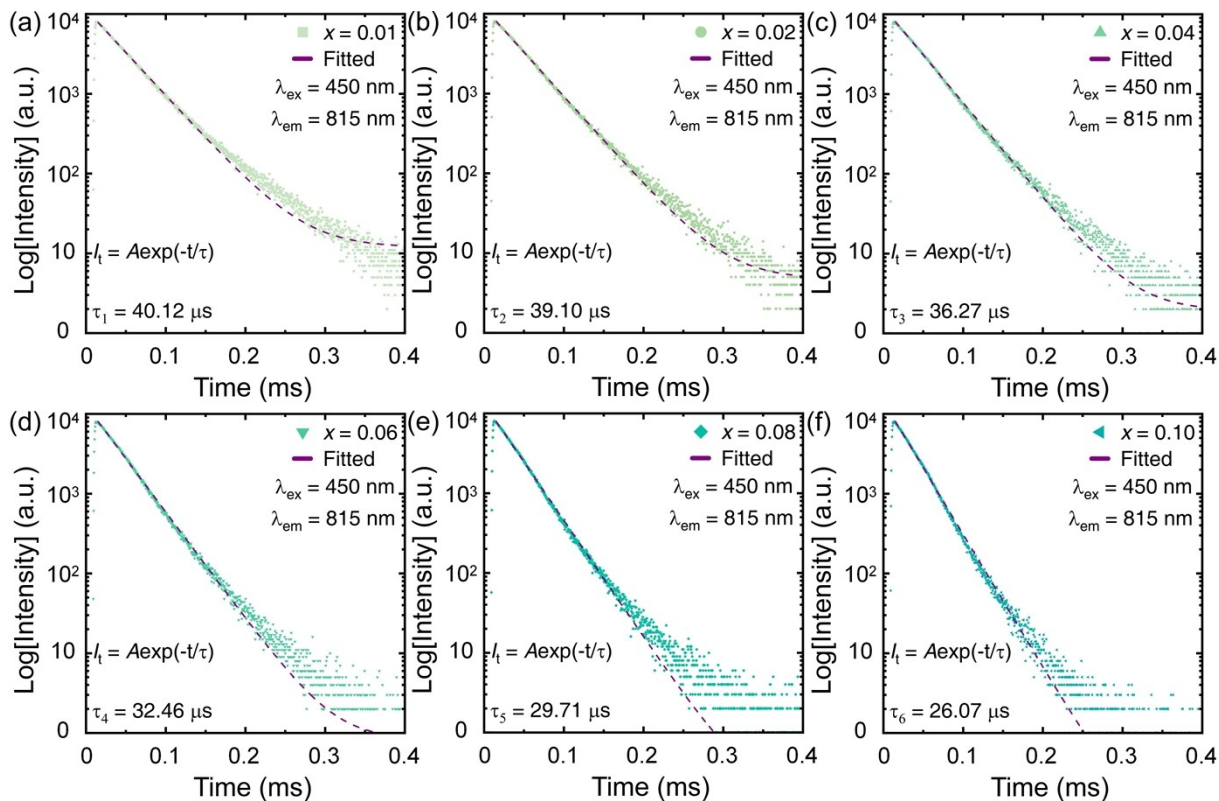

**Fig. S5.** (a-f) Room-temperature decay curves of  $\text{Mg}_{3-x}\text{Gd}_2\text{Ge}_3\text{O}_{12}:x\text{Cr}^{3+}$  ( $x = 0, 0.01, 0.02, 0.04, 0.06, 0.08,$  and  $0.10$ ) samples excited by 450 nm and monitored at 815 nm.

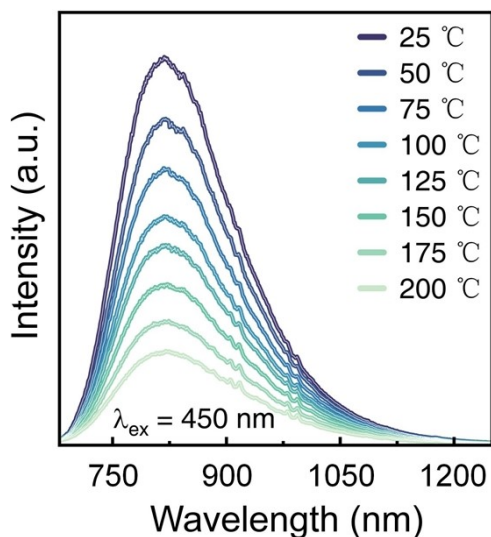

**Fig. S6.** Temperature-dependent emission spectra of  $\text{Mg}_{2.96}\text{Gd}_2\text{Ge}_3\text{O}_{12}:0.04\text{Cr}^{3+}$  samples excited by 450 nm.

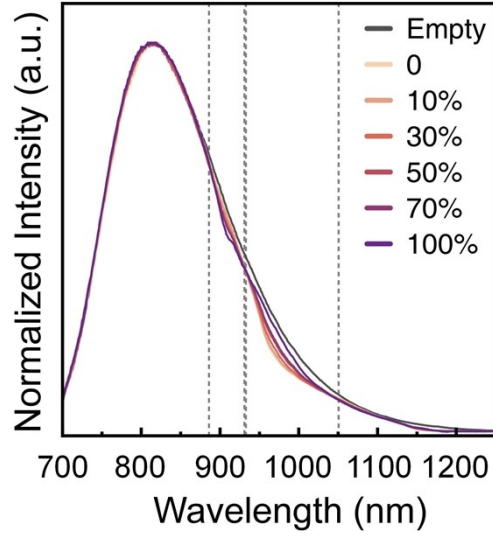

**Fig. S7.** Normalized transmission spectra of NIR light after penetrating alcohol solution in various concentrations.

**Table S1.** The refined atomic position of  $\text{Mg}_3\text{Gd}_2\text{Ge}_3\text{O}_{12}$  sample.

| Atom   | Wyck. position | Occupation | $x$        | $y$        | $z$        |
|--------|----------------|------------|------------|------------|------------|
| Mg (1) | $16a$          | 1          | 0          | 0          | 0          |
| Mg (2) | $24c$          | 1/3        | 1/8        | 0          | 1/4        |
| Gd (1) | $24c$          | 2/3        | 1/8        | 0          | 1/4        |
| Ge (1) | $24d$          | 1          | 3/8        | 0          | 1/4        |
| O (1)  | $96h$          | 1          | 0.09726(0) | 0.19325(0) | 0.28466(0) |

**Table S2.** The detailed input and output parameters for Mg<sub>2.96</sub>Gd<sub>2</sub>Ge<sub>3</sub>O<sub>12</sub>:0.04Cr<sup>3+</sup>-containing device.

| Current (mA) | Total input power (mW) | Total output power (mW) | Blue light output power (mW) | NIR output power (mW) | NIR photoelectric efficiency (%) |
|--------------|------------------------|-------------------------|------------------------------|-----------------------|----------------------------------|
| 25           | 65.18                  | 7.09                    | 0.99                         | 6.10                  | 9.36                             |
| 50           | 133.10                 | 13.99                   | 1.89                         | 12.10                 | 9.09                             |
| 75           | 203.10                 | 20.57                   | 2.78                         | 17.79                 | 8.76                             |
| 100          | 275.10                 | 26.84                   | 3.60                         | 23.24                 | 8.45                             |
| 125          | 348.90                 | 32.87                   | 4.39                         | 28.48                 | 8.16                             |
| 150          | 424.30                 | 38.42                   | 5.11                         | 33.31                 | 7.85                             |
| 175          | 501.50                 | 44.01                   | 5.85                         | 38.16                 | 7.61                             |
| 200          | 579.90                 | 49.41                   | 6.55                         | 42.86                 | 7.39                             |
| 225          | 660.50                 | 54.41                   | 7.22                         | 47.19                 | 7.14                             |
| 250          | 742.60                 | 59.68                   | 7.91                         | 51.77                 | 6.97                             |
| 275          | 825.70                 | 64.01                   | 8.53                         | 55.48                 | 6.72                             |
| 300          | 910.70                 | 68.28                   | 9.13                         | 59.15                 | 6.50                             |
| 325          | 996.30                 | 71.72                   | 9.66                         | 62.06                 | 6.23                             |
| 350          | 1084.00                | 76.03                   | 10.25                        | 65.78                 | 6.07                             |
